# Supplementary material
Source: PubMed Central journal article supplement (PMC1847668)
Supplement: 7601642s2.pdf [file 7601642s2.pdf]

**Supplementary Table I: siRNA duplexes used in this study**

| Targeted gene | siRNA sequence                                                                                   | Reference                |
|---------------|--------------------------------------------------------------------------------------------------|--------------------------|
| Nup160        | <b>CGGGATGTCATATGTCTTATA</b><br>CTGGATTGAATTGGCCTGAAA                                            |                          |
| Nup133        | <b>AAGTCGATGACCAGCTGACCATT</b>                                                                   | (Walther et al., 2003)   |
| Nup107        | <b>AAGAGGAAAGUGUAUUCGCAGTT</b>                                                                   | (Walther et al., 2003)   |
| Nup85         | <b>ACCCATTGATCTGCACTACTA</b><br>CCGTAAGGATGTAGATGTTTA                                            |                          |
| Nup43         | <b>TAGCATTAGTAACCAAGCTAA</b><br>AACUUGGACUCUGAUGGAGGG                                            |                          |
| Nup37         | <b>TTGCAGGAAATGATTGGTTAA</b><br>TTGATTCATTGCCTCCAGTAA                                            |                          |
| Seh1          | <b>a) AAGACACATAGTGGATCTGTATG</b><br><b>b) AAGGACAACCTCTGGTGGATAGCA</b><br>GGCGAGTGAGTTGGAATATAA | (Loiodice et al., 2004)  |
| Nuf2          | <b>GCATGCCGTGAAACGTATA</b>                                                                       | (DeLuca et al., 2002)    |
| Hec1          | <b>CCGAGACCACTTAATGACAAA</b><br>TCCAAAGGTTATGACTTTGAA                                            |                          |
| CENP-E        | <b>CACGATACTGTAAACATGAAT</b><br>CAGGTTAATCCTACCACACAA                                            |                          |
| CENP-F        | <b>AAGAGAAGACCCCAAGTCATC</b><br>CAGAATCTTAGTAGTCAAGTA                                            |                          |
| Mad1          | <b>CAGGACCAAAGTGCTGCACAT</b><br>CAGCTGGACCTGCAACACAAA                                            |                          |
| Mad2          | <b>GGAAGAGTCGGGACCACAG</b>                                                                       | (De Antoni et al., 2005) |
| Bub1          | <b>CAGCTTGTGATAAAGAGTCAA</b><br>CCCATGGAATATTTCCATGTA                                            |                          |
| BubR1         | <b>AAGGAGACAACCTAAACTGCAA</b><br>CAGGTAGACCTGTTTGGTATA                                           |                          |
| RanGAP1       | <b>ACGGAAGATTCTGGACCCTAA</b><br>AGGCAAGAGCCTCAAACCTCAA                                           |                          |
| RanBP2        | <b>AACAACACCAAAGCAGTGGT</b>                                                                      | (Salina et al., 2003)    |
| INCENP        | <b>GAAGCAGATTGAGCAGAAG</b>                                                                       | (Honda et al., 2003)     |
| Zwint         | <b>TTGCGGTGAACCAGAATTATA</b><br>CCCAACCATCATTACAGGAAA                                            |                          |
| Zw-10         | <b>ACCGGTGAATTTACAGACTTA</b><br>CAGCATGGAGCTCACAATACA                                            |                          |
| GFP           | <b>AAGAACGGCATCCAAGGTGAA</b>                                                                     |                          |
| Lamin A       | <b>GGCTGAAGGACCTGGAGGCTCTG</b>                                                                   | (Elbashir et al., 2001)  |

The siRNA duplexes used in this study were purchased from QIAGEN (Valencia, CA) or Dharmacon (Lafayette, CO) and their efficiency validated by immunofluorescence or western blot. For previously unpublished siRNA sequences, two independent siRNA, designed by QIAGEN, were systematically used (sequences appearing in bold correspond to the one used in the published figures).

- De Antoni, A., Pearson, C.G., Cimini, D., Canman, J.C., Sala, V., Nezi, L., Mapelli, M., Sironi, L., Faretta, M., Salmon, E.D. and Musacchio, A. (2005) The Mad1/Mad2 complex as a template for Mad2 activation in the spindle assembly checkpoint. *Curr Biol*, 15, 214-225.
- DeLuca, J.G., Moree, B., Hickey, J.M., Kilmartin, J.V. and Salmon, E.D. (2002) hNuf2 inhibition blocks stable kinetochore-microtubule attachment and induces mitotic cell death in HeLa cells. *J Cell Biol*, 159, 549-555.
- Elbashir, S., Harborth, J., Lendeckel, W., Yalcin, A., Weber, K. and Tuschl, T. (2001) Duplexes of 21-nucleotide RNAs mediate RNA interference in cultured mammalian cells. *Nature*, 411, 494-498.
- Honda, R., Korner, R. and Nigg, E.A. (2003) Exploring the functional interactions between Aurora B, INCENP, and survivin in mitosis. *Mol Biol Cell*, 14, 3325-3341.
- Loiodice, I., Alves, A., Rabut, G., Van Overbeek, M., Ellenberg, J., Sibarita, J.B. and Doye, V. (2004) The entire Nup107-160 complex, including three new members, is targeted as one entity to kinetochores in mitosis. *Mol Biol Cell*, 15, 3333-3344.
- Salina, D., Enarson, P., Rattner, J.B. and Burke, B. (2003) Nup358 integrates nuclear envelope breakdown with kinetochore assembly. *J. Cell Biol.*, 162, 991-1001.
- Walther, T.C., Alves, A., Pickersgill, H., Loiodice, I., Hetzer, M., Galy, V., Hulsmann, B.B., Kocher, T., Wilm, M., Allen, T., Mattaj, I.W. and Doye, V. (2003) The conserved Nup107-160 complex is critical for nuclear pore complex assembly. *Cell*, 113, 195-206.
